# Supplementary material for: Uniformly dispersed self-assembled growth of Sb2O3/Sb@graphene nanocomposites on a 3D carbon sheet network for high Na-storage capacity and excellent stability
Source: Royal Society of Chemistry journal article supplement (doi:10.1039/c4ta06825d), 2015-01-01

**Supporting information for**

**Uniformly Dispersed Self-Assembled Growth of Sb<sub>2</sub>O<sub>3</sub>/Sb@Graphene  
Nanocomposites on 3D Carbon Sheet Network for High Na-Storage and  
Excellent Stability**

**N. Li, S. Liao, Y. Sun, H. W. Song, G. W. Yang and C. X. Wang\***

*State key laboratory of optoelectronic materials and technologies, School of Physics  
Science and Engineering, Sun Yat-sen (Zhongshan) University, Guangzhou 510275,  
People's Republic of China*

*\* Correspondence and requests for materials should be addressed to C.X.W. e-mail:*

*[wchengx@mail.sysu.edu.cn](mailto:wchengx@mail.sysu.edu.cn)*

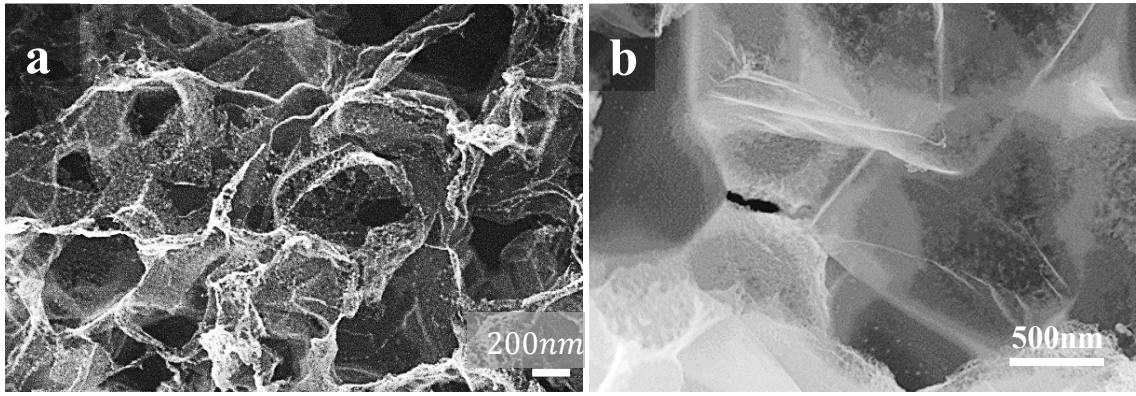

z

**Figure S1.** (a),(b) High resolution SEM micrograph of carbon sheet networks anchored with  $\text{Sb}_2\text{O}_3$  ( $\text{Sb}_2\text{O}_3$ -CSNs) at different positions.

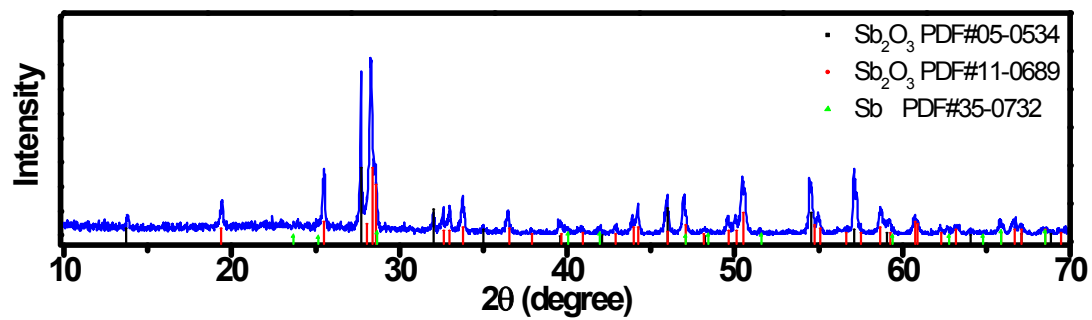

Figure S2. XRD spectrum of Sb<sub>2</sub>O<sub>3</sub>/Sb-CSNs.

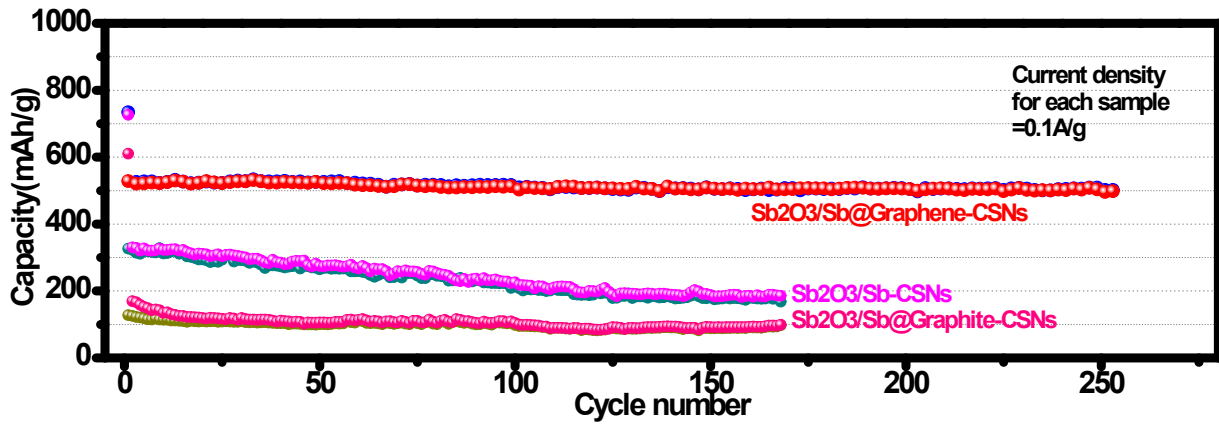

**Figure S3.** Cycling performances of Sb<sub>2</sub>O<sub>3</sub>/Sb@graphene-CSNs, Sb<sub>2</sub>O<sub>3</sub>/Sb@graphene-CSNs and Sb<sub>2</sub>O<sub>3</sub>/Sb@graphite-CSNs at 0.1A/g in the potential range of 0.001-2V.

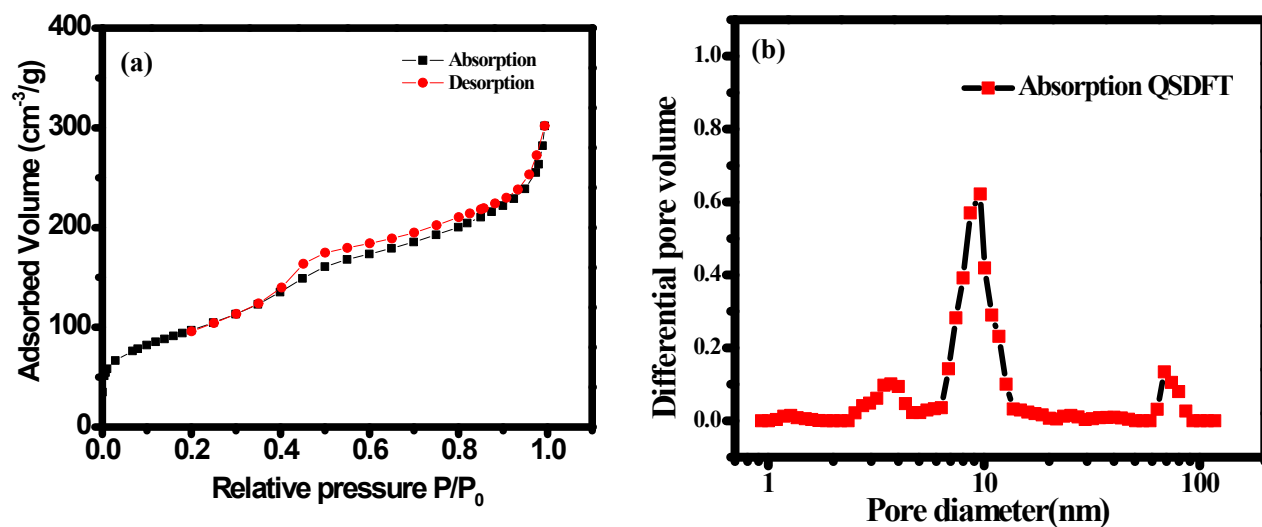

**Figure S4.** (a)  $\text{N}_2$  adsorption/desorption isotherms of  $\text{Sb}_2\text{O}_3/\text{Sb}@$ graphene-CSNs. (b) Corresponding pore-size distributions determined in accordance with the original density functional theory.

Figure S5. Raman spectrum of the  $\text{Sb}_2\text{O}_3/\text{Sb@graphene-CSNs}$  composite.

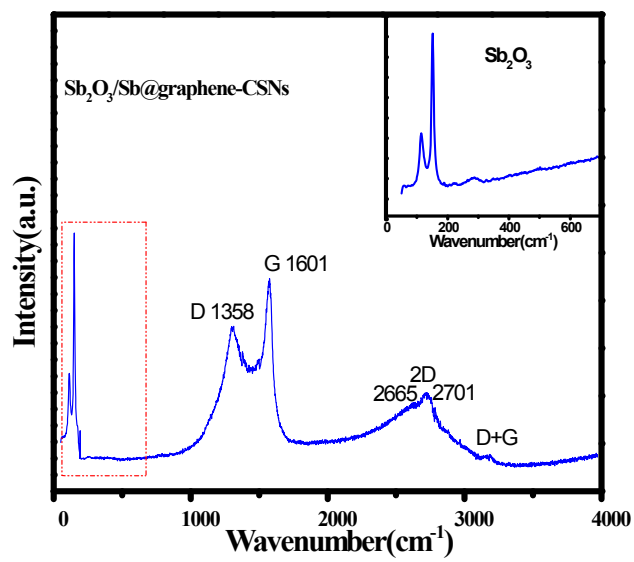

**Figure S6**

High resolution TEM micrographs and their corresponding Fourier transform of Sb, Sb<sub>2</sub>O<sub>3</sub> nanoparticles in Sb<sub>2</sub>O<sub>3</sub>/Sb-CSNs.

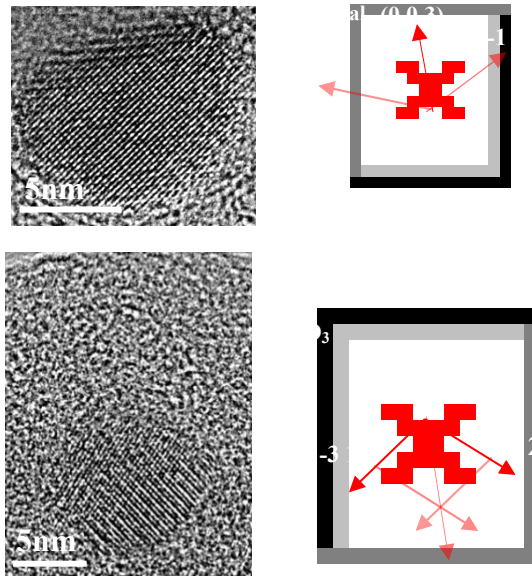

**Figure S7.** (a) Low resolution and (b) high resolution TEM micrographs of  $\text{Sb}_2\text{O}_3/\text{Sb}@$ graphene-CSNs after cycling (0.7-2.0V, 30mA/g, 10 cycles). These samples were acquired at fully charged state.

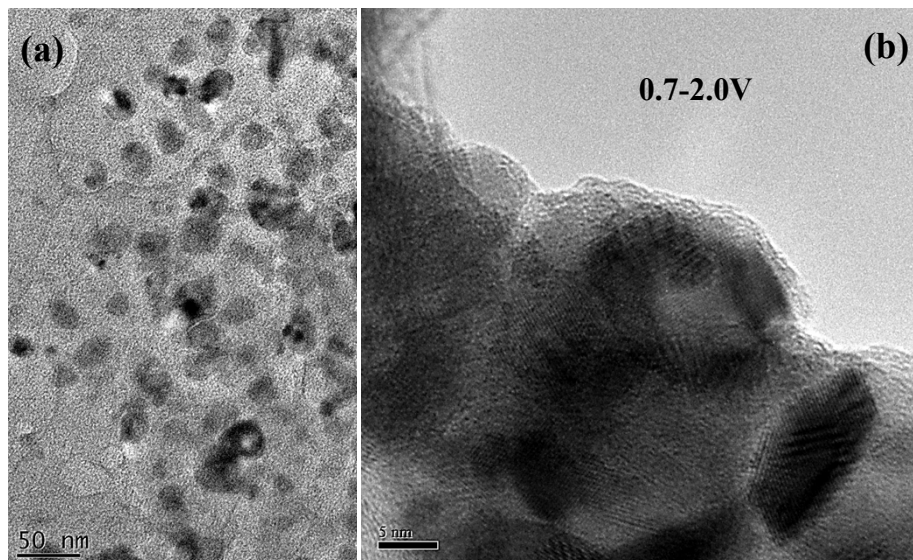

**Figure S8.** (a)TEM micrograph of the composite after discharging to 0.001 V and its corresponding SAED pattern (b). Major diffraction circles are labeled with their respective hkl notation.

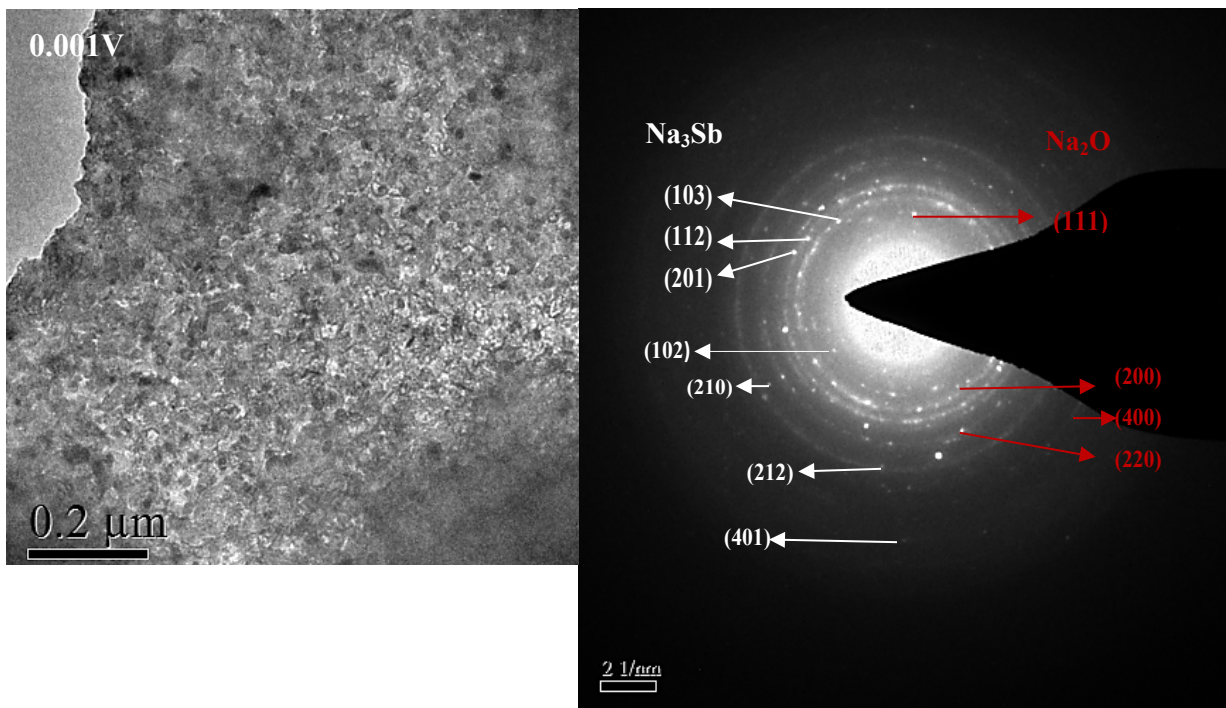

Supplement: c4ta06825d1.pdf [file c4ta06825d1.pdf]
